# Supplementary material
Source: publisher site journal article supplement (https://www.dovepress.com/get_supplementary_file.php?f=187151.xlsx)
Supplement: Supplementary file 1 [file get_supplementary_file.php]

## Sheet: Sheet1
ID	adj.P.Val	P.Value	t	B	logFC	Gene.symbol	Gene.title
204304_s_at	1.27e-14	5.67e-16	-8.63	25.4898	-2.87	PROM1	prominin 1
205044_at	2.71e-12	1.79e-13	-7.76	19.8259	-2.86	GABRP	gamma-aminobutyric acid type A receptor pi subunit
205030_at	2.06e-10	1.91e-11	-7.01	15.2439	-2.82	FABP7	fatty acid binding protein 7
231535_x_at	1.63e-20	3.17e-22	-10.6	39.705	-2.71	ROPN1	rhophilin associated tail protein 1
215729_s_at	3.36e-16	1.18e-17	-9.19	29.3104	-2.64	VGLL1	vestigial like family member 1
235238_at	1.01e-17	2.87e-19	-9.71	32.975	-2.54	SHC4	SHC adaptor protein 4
223861_at	4.93e-17	1.55e-18	-9.48	31.3138	-2.51	HORMAD1	HORMA domain containing 1
1553613_s_at	2.42e-21	4.22e-23	-10.9	41.6986	-2.47	FOXC1	forkhead box C1
220559_at	2.39e-27	2.1e-29	-12.8	56.0685	-2.46	EN1	engrailed homeobox 1
223062_s_at	2.41e-16	8.26e-18	-9.24	29.6596	-2.45	PSAT1	phosphoserine aminotransferase 1
60474_at	1.45e-39	3.64e-42	-16.4	85.1893	-2.42	FERMT1	fermitin family member 1
210147_at	2.17e-16	7.36e-18	-9.26	29.7735	-2.35	ART3	ADP-ribosyltransferase 3
220625_s_at	2.25e-10	2.1e-11	-7	15.1526	-2.33	ELF5	E74 like ETS transcription factor 5
220425_x_at	1.73e-18	4.39e-20	-9.97	34.831	-2.32	ROPN1B	rhophilin associated tail protein 1B
226913_s_at	8.04e-16	2.99e-17	-9.06	28.3913	-2.15	SOX8	SRY-box 8
213680_at	5.92e-08	8.73e-09	-5.94	9.26546	-2.1	KRT6B	keratin 6B
205029_s_at	5.4e-10	5.4e-11	-6.84	14.2273	-2.09	FABP7	fatty acid binding protein 7
230538_at	4e-20	8.23e-22	-10.5	38.7608	-2.04	SHC4	SHC adaptor protein 4
214440_at	1.23e-14	5.47e-16	8.64	25.5249	2.01	NAT1	N-acetyltransferase 1
223878_at	5.39e-41	1.1e-43	16.8	88.6526	2.02	INPP4B	inositol polyphosphate-4-phosphatase type II B
210096_at	4.29e-14	2.08e-15	8.44	24.2081	2.02	CYP4B1	cytochrome P450 family 4 subfamily B member 1
229160_at	5.18e-27	4.75e-29	12.7	55.2577	2.02	MUM1L1	MUM1 like 1
226197_at	1.38e-17	3.98e-19	9.66	32.6531	2.03	AR	androgen receptor
225516_at	7.05e-15	3.01e-16	8.72	26.1153	2.03	SLC7A2	solute carrier family 7 member 2
205696_s_at	2.85e-23	4.05e-25	11.5	46.2961	2.03	GFRA1	GDNF family receptor alpha 1
229053_at	1.38e-18	3.42e-20	10	35.0768	2.05	SYT17	synaptotagmin 17
228708_at	1.77e-19	4.01e-21	10.3	37.1947	2.07	RAB27B	RAB27B, member RAS oncogene family
223423_at	3.34e-19	7.82e-21	10.2	36.5352	2.08	GPR160	G protein-coupled receptor 160
1568838_at	2.49e-28	1.9e-30	13.1	58.4484	2.08	WASIR2	WASH and IL9R antisense RNA 2
227929_at	2.58e-27	2.28e-29	12.8	55.9845	2.09	LIN7A	lin-7 homolog A, crumbs cell polarity complex component
1562821_a_at	1.29e-13	6.75e-15	8.26	23.0503	2.14	DSCAM-AS1	DSCAM antisense RNA 1
203963_at	1.17e-14	5.2e-16	8.64	25.5747	2.16	CA12	carbonic anhydrase 12
209612_s_at	8.19e-07	1.54e-07	5.39	6.48264	2.16	ADH1B	alcohol dehydrogenase 1B (class I), beta polypeptide
204623_at	1.71e-15	6.65e-17	8.94	27.6023	2.17	TFF3	trefoil factor 3
233498_at	1.76e-28	1.31e-30	13.1	58.8166	2.18	ERBB4	erb-b2 receptor tyrosine kinase 4
226192_at	7.45e-17	2.39e-18	9.41	30.8818	2.18	AR	androgen receptor
1558686_at	2.08e-18	5.29e-20	9.94	34.6457	2.19	MPV17L	MPV17 mitochondrial inner membrane protein like
235046_at	1.55e-23	2.13e-25	11.6	46.93	2.21	INPP4B	inositol polyphosphate-4-phosphatase type II B
205597_at	1.45e-26	1.39e-28	12.5	54.1915	2.24	SLC44A4	solute carrier family 44 member 4
205355_at	1.63e-36	5.56e-39	15.5	77.9211	2.25	ACADSB	acyl-CoA dehydrogenase, short/branched chain
227198_at	5.01e-15	2.09e-16	8.78	26.4719	2.26	AFF3	AF4/FMR2 family member 3
209604_s_at	1.97e-16	6.67e-18	9.27	29.8707	2.26	GATA3	GATA binding protein 3
209460_at	7.71e-30	4.88e-32	13.5	62.0752	2.27	ABAT	4-aminobutyrate aminotransferase
205509_at	3.74e-12	2.52e-13	7.71	19.491	2.28	CPB1	carboxypeptidase B1
230163_at	1.27e-27	1.07e-29	12.8	56.7389	2.31	GFRA1	GDNF family receptor alpha 1
219734_at	2.18e-23	3.06e-25	11.5	46.5727	2.33	SIDT1	SID1 transmembrane family member 1
214164_x_at	3.4e-23	4.86e-25	11.5	46.1155	2.35	CA12	carbonic anhydrase 12
205357_s_at	1.25e-15	4.75e-17	8.99	27.9347	2.43	AGTR1	angiotensin II receptor type 1
230748_at	1.59e-25	1.75e-27	12.2	51.687	2.44	SLC16A6	solute carrier family 16 member 6
218211_s_at	7.57e-24	1.01e-25	11.7	47.6689	2.44	MLPH	melanophilin
237086_at	5.54e-24	7.27e-26	11.7	47.9959	2.44	FOXA1	forkhead box A1
1553434_at	1.38e-20	2.64e-22	10.7	39.8858	2.46	CYP4Z2P	cytochrome P450 family 4 subfamily Z member 2, pseudogene
214774_x_at	9.2e-15	4.01e-16	8.68	25.8315	2.48	TOX3	TOX high mobility group box family member 3
243311_at	2.29e-48	2.35e-51	19	106.158	2.48	DEFB132	defensin beta 132
218976_at	7.12e-18	1.98e-19	9.76	33.3408	2.48	DNAJC12	DnaJ heat shock protein family (Hsp40) member C12
212956_at	3.88e-27	3.51e-29	12.7	55.5581	2.49	TBC1D9	TBC1 domain family member 9
223864_at	1.32e-35	4.91e-38	15.2	75.7614	2.5	ANKRD30A	ankyrin repeat domain 30A
222835_at	6.03e-25	7.08e-27	12	50.3029	2.51	THSD4	thrombospondin type 1 domain containing 4
224146_s_at	6.81e-31	3.88e-33	13.8	64.5857	2.54	ABCC11	ATP binding cassette subfamily C member 11
219197_s_at	4.49e-17	1.4e-18	9.49	31.414	2.55	SCUBE2	signal peptide, CUB domain and EGF like domain containing 2
209459_s_at	2.46e-25	2.78e-27	12.1	51.2278	2.58	ABAT	4-aminobutyrate aminotransferase
1560850_at	7.75e-33	3.62e-35	14.4	69.2185	2.6	LOC101926959	uncharacterized LOC101926959
1553602_at	1.19e-10	1.06e-11	7.11	15.8257	2.61	MUCL1	mucin like 1
209603_at	2.85e-20	5.72e-22	10.6	39.12	2.63	GATA3	GATA binding protein 3
205009_at	1.61e-16	5.38e-18	9.3	30.0822	2.68	TFF1	trefoil factor 1
227081_at	4.07e-37	1.29e-39	15.7	79.3709	2.72	DNALI1	dynein axonemal light intermediate chain 1
214079_at	1.71e-10	1.55e-11	7.05	15.4477	2.73	DHRS2	dehydrogenase/reductase 2
209602_s_at	5.57e-21	1.01e-22	10.8	40.8313	2.79	GATA3	GATA binding protein 3
205862_at	2.57e-27	2.27e-29	12.8	55.9901	2.81	GREB1	growth regulation by estrogen in breast cancer 1
214053_at	8.01e-20	1.72e-21	10.4	38.0316	2.86	ERBB4	erb-b2 receptor tyrosine kinase 4
211657_at	1.42e-18	3.52e-20	10	35.0488	2.86	CEACAM6	carcinoembryonic antigen related cell adhesion molecule 6
229580_at	2.7e-23	3.83e-25	11.5	46.3521	2.91	CLSTN2	calsyntenin 2
237339_at	7.6e-35	2.96e-37	15	73.9806	3.04	LINC00993	long intergenic non-protein coding RNA 993
228969_at	5.85e-41	1.21e-43	16.8	88.5631	3.14	AGR2	anterior gradient 2, protein disulphide isomerase family member
209173_at	9.71e-22	1.62e-23	11	42.6448	3.15	AGR2	anterior gradient 2, protein disulphide isomerase family member
206754_s_at	2.73e-24	3.4e-26	11.8	48.7489	3.21	CYP2B7P///CYP2B6	cytochrome P450 family 2 subfamily B member 7, pseudogene///cytochrome P450 family 2 subfamily B member 6
228554_at	2.31e-29	1.54e-31	13.4	60.9365	3.27	PGR	progesterone receptor
237395_at	1.69e-26	1.64e-28	12.5	54.0294	3.3	CYP4Z1	cytochrome P450 family 4 subfamily Z member 1
228915_at	2.43e-32	1.2e-34	14.3	68.0283	3.47	DACH1	dachshund family transcription factor 1
205225_at	2.44e-22	3.84e-24	11.2	44.0689	3.49	ESR1	estrogen receptor 1
206378_at	1.39e-14	6.29e-16	8.62	25.3872	3.58	SCGB2A2	secretoglobin family 2A member 2
228241_at	1.16e-35	4.22e-38	15.2	75.9115	4.68	AGR3	anterior gradient 3, protein disulphide isomerase family member
